# Anti-desmoglein2 autoantibodies are present in patients with cardiac sarcoidosis and correlate with cardiac inflammation

Suna G.<sup>1</sup>; Kolios A.<sup>2</sup>; Chatterjee D.<sup>3</sup>; Fatah M.<sup>3</sup>; Gasperetti A.<sup>1</sup>; Casella M.<sup>4</sup>; Sommariva E.<sup>5</sup>; Franzen D.<sup>1</sup>; Manka R.<sup>1</sup>; Pazhenkottil A.<sup>1</sup>; Ruschitzka F.<sup>1</sup>; Boyman O.<sup>1</sup>; Duru F.<sup>1</sup>; Hamilton RM.<sup>3</sup>; Saguner AM.<sup>1</sup>

<sup>1</sup>University Hospital Zurich, Zurich, Switzerland

<sup>2</sup>Beth Israel Deaconess Medical Center & Harvard Medical School, Boston, United States of America

<sup>3</sup>University of Toronto, The Labatt Family Heart Centre and Translational Medicine, The Hospital for Sick Children, Toronto, Canada

<sup>4</sup>Marche Polytechnic University of Ancona, Ancona, Italy

<sup>5</sup>Centro Cardiologico Monzino, IRCCS, Milan, Italy

**Funding Acknowledgements:** Type of funding sources: Foundation. Main funding source(s): The Zurich ACM Program is supported by generous grants from the Georg and Bertha Schwyzer-Winniker Foundation, the Baugarten Foundation, Swiss National Science Foundation, Swiss Heart Foundation and Wild Foundation. This work is also supported by a Canadian Institutes of Health Research grant (FRN: 162402) and the Labatt Heart Centre and Waugh Family Innovation Funds, Caitlin Elizabeth Morris Memorial Fund, Alex Corrance Memorial Foundation and Meredith Cartwright.

**BACKGROUND** Arrhythmogenic right ventricular cardiomyopathy (ARVC) has several phenocopies such as cardiac sarcoidosis (CS), idiopathic outflow tract ventricular tachycardia (OT-VT) and myocarditis. Differentiation between these entities can be challenging. Recently, we have identified diagnostic anti-desmoglein-2 autoantibodies (anti-DSG2 Abs) in patients with ARVC.

**PURPOSE** We sought to examine whether anti-DSG2 Abs are also present in clinical phenocopies of ARVC.

**METHODS** Anti-DSG2 Abs in sera of 25, 19 and 22 patients with sarcoidosis, OT-VT and myocarditis, respectively, were assessed by western blots and ELISA. Clinical and imaging parameters, as well as conventional biomarkers were correlated to detected anti-DSG2 Ab intensity levels.

**RESULTS** Anti-DSG2 Abs, at various intensities, were identified in 6/25 (24%) patients with sarcoidosis, all presenting with CS, but were absent in patients with OT-VT and myocarditis. Cardiac 18F- fluorodeoxyglucose positron emission tomography (18F-FDG PET) was positive in all sarcoidosis patients with positive anti-DSG2 Abs, corresponding to a median PET maximum standardized uptake value (SUVmax) of 5.65 [IQR: 5.15 – 10.9]. In sarcoidosis patients without anti-DSG2 Abs, the SUVmax values were significantly lower with a median of 0 [IQR: 0 – 4] ( $p = 0.011$ ). The Pearson correlation coefficient ( $R$ ) was 0.188 ( $p = 0.039$ ) indicating a positive correlation between cardiac 18F-FDG uptake and anti-DSG2 Abs. No significant correlation was detected for any of the other clinical parameters and biomarkers.

**CONCLUSIONS** In addition to being present in ARVC, anti-DSG2 Abs are also found in CS, a common phenocopy of ARVC; conversely, anti-DSG2 Abs are absent in idiopathic OT-VT and myocarditis. Anti-DSG2 Ab levels positively correlate with myocardial disease activity in CS as indicated by cardiac 18F-FDG PET scanning.

Abstract Figure. Central illustration

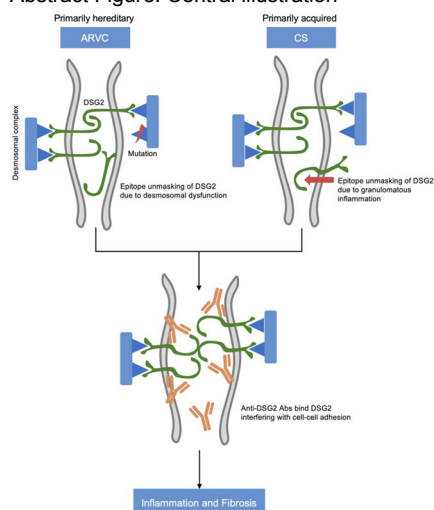

Source: http://academic.oup.com/europace/article-pdf/23/Supplement_3/euab116.539/38130758/euab116.539.pdf
